# Supplementary material
Source: PubMed Central journal article supplement (PMC6764099)
Supplement: NIHMS1030216-supplement-Supplemental.pdf [file NIHMS1030216-supplement-Supplemental.pdf]

# STABLE RECOMBINANT PRODUCTION OF CODON-SCRAMBLED LUBRICIN AND MUCIN IN HUMAN CELLS

## AUTHORS

Carolyn R. Shurer, Yuyan Wang, Elizabeth Feeney, Shelby E. Head, Victoria X. Zhang, Jin Su, Zhu Cheng, Morgan A. Stark, Larry J. Bonassar, Heidi L. Reesink, and Matthew J. Paszek

## SUPPLEMENTAL FIGURES

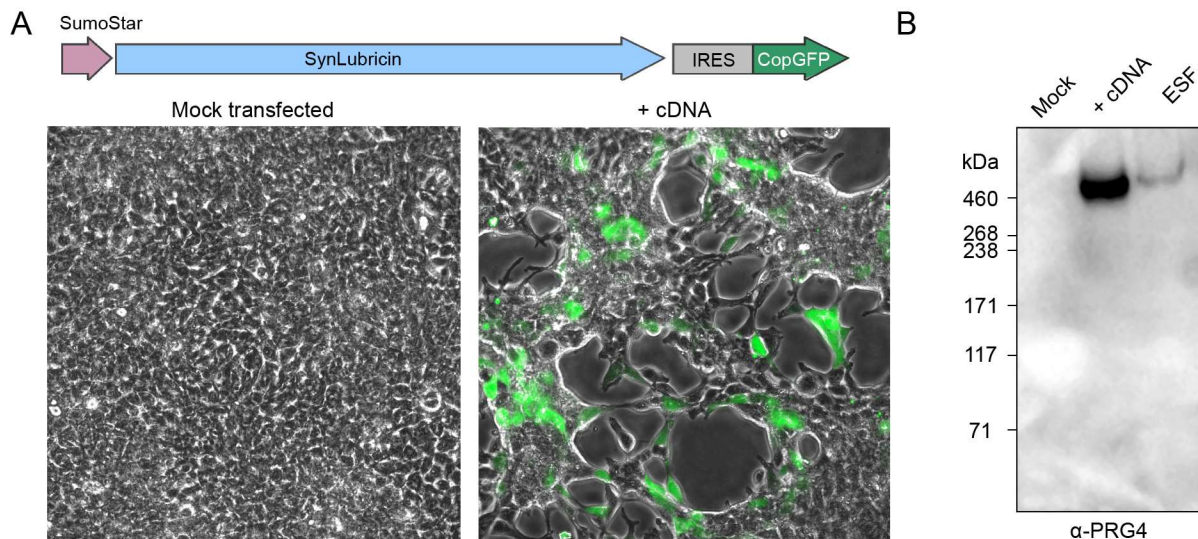

**Supplemental Figure 1: Transient expression of SynLubricin altered adherent cell morphology.** **A)** Morphology of 293-T cells mock transfected or transfected with cDNA for bicistronic SynLubricin IRES copGFP. Images shown are a merged overlay of phase contrast and fluorescence micrographs. Note the inhibition of cell-cell adhesion near cells expressing high levels of the copGFP reporter. **B)** Western blot of equine synovial fluid (ESF) and media supernatant from mock-transfected and SynLubricin-transfected cells probed with MABT401 antibody against PRG4 tandem repeats.

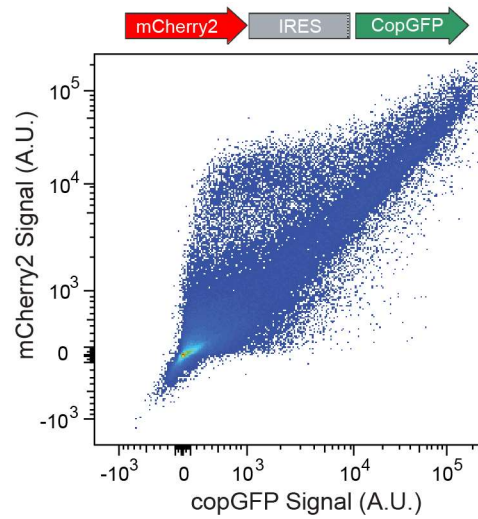

**Supplemental Figure 2: Validation of new transposon-based gene delivery vector.**

Flow cytometry results showing correlation of levels of mCherry2 and the copGFP reporter.

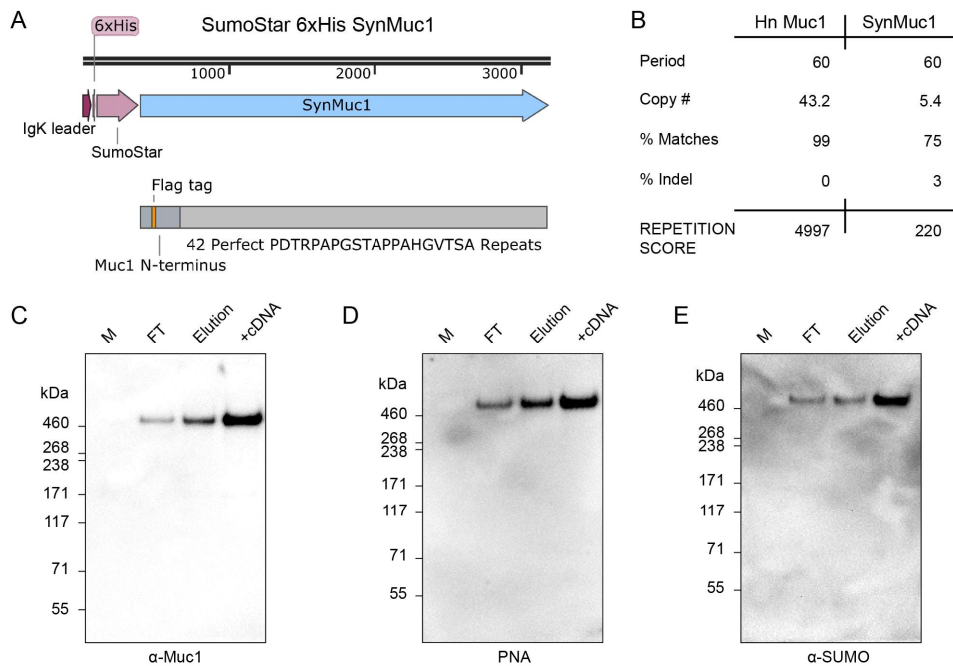

**Supplemental Figure 3: Application of the codon-scrambling strategy for Muc1. A)**

Schematic of SynMuc1 with codon-scrambled tandem repeats. **B)** Calculated repetition

score for the nucleotides encoding the tandem repeats of human Muc1 and SynMuc1. **C)** Western blot of media supernatant from 293-F cells transfected with SynMuc1 cDNA (+cDNA) or non-transfected cells (M), Ni-NTA resin flow through from His-affinity purification (FT), and eluted protein (Elution) probed with a Muc1 antibody. **D)** PNA-lectin blot of C. **E)** Western blot of C, probed with a SUMO antibody.

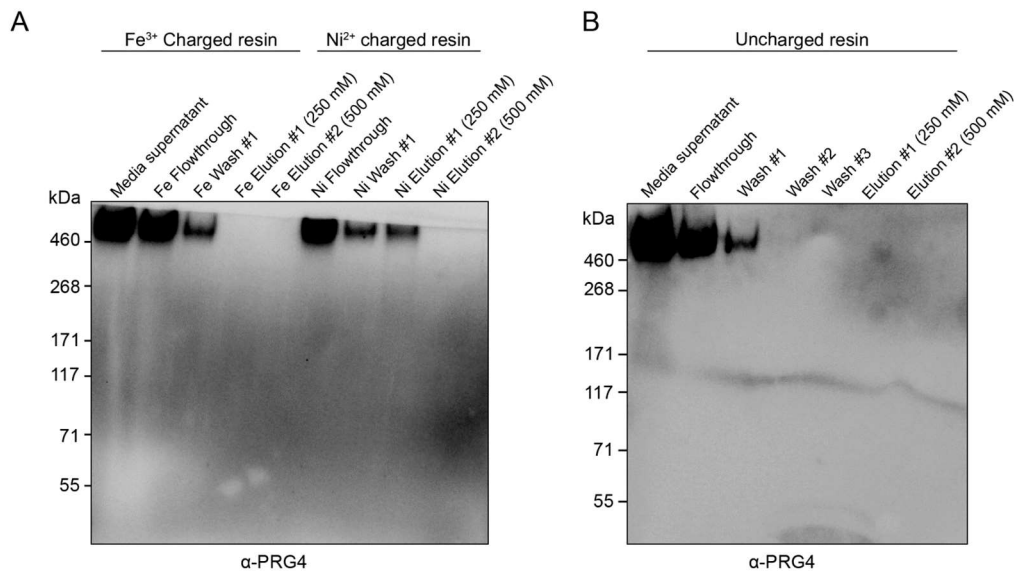

**Supplemental Figure 4: SynLubricin has low affinity for immobilized-metal-affinity-chromatography (IMAC) resin. A)** Western blot of media supernatant and the IMAC purification flow throughs, washes, and eluted fractions from Fe<sup>3+</sup> and Ni<sup>2+</sup> loaded nitrotriactic acid (NTA) resins. Elutions were performed at the indicated NaCl concentration. No non-specific binding of sialic acids to multivalent Fe<sup>3+</sup> was observed. **B)** Western blot of flow through, wash, and eluted fractions from uncharged NTA resin.

**Human PRG4A Repeats**Amino acid composition

|         |     |       |
|---------|-----|-------|
| Ala (A) | 58  | 11.4% |
| Arg (R) | 0   | 0.0%  |
| Asn (N) | 1   | 0.2%  |
| Asp (D) | 2   | 0.4%  |
| Cys (C) | 0   | 0.0%  |
| Gln (Q) | 0   | 0.0%  |
| Glu (E) | 48  | 9.4%  |
| Gly (G) | 4   | 0.8%  |
| His (H) | 0   | 0.0%  |
| Ile (I) | 1   | 0.2%  |
| Leu (L) | 7   | 1.4%  |
| Lys (K) | 69  | 13.6% |
| Met (M) | 0   | 0.0%  |
| Phe (F) | 0   | 0.0%  |
| Pro (P) | 155 | 30.5% |
| Ser (S) | 13  | 2.6%  |
| Thr (T) | 150 | 29.5% |
| Trp (W) | 0   | 0.0%  |
| Tyr (Y) | 0   | 0.0%  |
| Val (V) | 0   | 0.0%  |

**SynLubricin Repeats**Amino acid composition

|         |     |       |
|---------|-----|-------|
| Ala (A) | 59  | 12.5% |
| Arg (R) | 0   | 0.0%  |
| Asn (N) | 0   | 0.0%  |
| Asp (D) | 0   | 0.0%  |
| Cys (C) | 0   | 0.0%  |
| Gln (Q) | 0   | 0.0%  |
| Glu (E) | 59  | 12.5% |
| Gly (G) | 0   | 0.0%  |
| His (H) | 0   | 0.0%  |
| Ile (I) | 0   | 0.0%  |
| Leu (L) | 0   | 0.0%  |
| Lys (K) | 59  | 12.5% |
| Met (M) | 0   | 0.0%  |
| Phe (F) | 0   | 0.0%  |
| Pro (P) | 177 | 37.5% |
| Ser (S) | 0   | 0.0%  |
| Thr (T) | 118 | 25.0% |
| Trp (W) | 0   | 0.0%  |
| Tyr (Y) | 0   | 0.0%  |
| Val (V) | 0   | 0.0%  |

**Supplemental Table 1: Amino acid compositions in the tandem repeats of human PRG4 isoform A and SynLubricin.**
